# Supplementary material for: Functional Biodiversity of Yeasts Isolated from Colombian Fermented and Dry Cocoa Beans
Source: PubMed Central journal article supplement (PMC7409280; doi:10.3390/microorganisms8071086), 2020-07-21
Supplement: microorganisms-08-01086-s001.pdf [file microorganisms-08-01086-s001.pdf]

**Table S1. Description of study sites and diversity indexes of yeasts included in the present study.**

| sample | Geographical coordinates |            | Type of drying | Drying Temperature (°C) |       | days of drying | $a_w$ | Log CFU·g <sup>-1</sup> | Shannon Index H' |
|--------|--------------------------|------------|----------------|-------------------------|-------|----------------|-------|-------------------------|------------------|
|        | Latitude                 | Longitude  |                | Day                     | Night |                |       |                         |                  |
| 1      | 03°10'55"N               | 76°27'37"W | floors         | 25-27                   | 18-19 | 5              | 0.421 | 4.44 ± 0.38             | 2.67             |
| 2      | 4°07'12"N                | 76°13'17"W | Trays          | 28-30                   | 17-18 | 4              | 0.501 | 3.46 ± 0.17             | 2.10             |
| 3      | 4°09'03"N                | 76°14'28"W | Trays          | 28-30                   | 17-18 | 5              | 0.534 | 1.80 ± 0.25             | 2.59             |
| 4      | 4°07'07"N                | 76°13'13"W | Trays          | 25-27                   | 18-19 | 3              | 0.550 | 1.00 ± 0.48             | 1.67             |
| 5      | 4°07'18"N                | 76°12'41"W | Trays          | 28-30                   | 17-18 | 3              | 0.535 | 1.50 ± 0.33             | 2.43             |
| 6      | 03°11'44"N               | 76°19'44"W | Trays          | 29-30                   | 18-19 | 5              | 0.650 | 5.63 ± 0.40             | 2.08             |
| 7      | 4°07'20"N                | 76°12'16"W | floors         | 28-30                   | 17-18 | 6              | 0.321 | 1.50 ± 0.50             | 1.69             |
| 8      | 4°08'07"N                | 76°12'43"W | Trays          | 25-27                   | 18-19 | 4              | 0.542 | 5.24 ± 0.81             | 2.24             |
| 9      | 4°08'24"N                | 76°13'11"W | Trays          | 25-27                   | 18-19 | 4              | 0.623 | 3.12 ± 0.80             | 1.00             |
| 10     | 03°13'58"N               | 76°17'38"W | floors         | 29-30                   | 18-19 | 6              | 0.449 | 2.55 ± 0.13             | 2.10             |
| 11     | 03°14'20"N               | 76°16'18"W | floors         | 28-33                   | 17-20 | 6              | 0.422 | 1.50 ± 0.51             | 1.00             |
| 12     | 4°07'12"N                | 76°12'08"W | floors         | 28-30                   | 17-18 | 4              | 0.440 | 1.69 ± 0.76             | 1.68             |
| 13     | 4°07'18"N                | 76°13'08"W | floors         | 28-30                   | 17-18 | 3              | 0.450 | 0.00 ± 0.46             | 1.00             |
| 14     | 4°07'21"N                | 76°13'08"W | Trays          | 25-27                   | 18-19 | 3              | 0.662 | 1.84 ± 0.50             | 1.00             |
| 15     | 03°14'30"N               | 76°16'01"W | Trays          | 29-30                   | 18-19 | 5              | 0.806 | 5.47 ± 0.56             | 2.30             |
| 16     | 4°07'21"N                | 76°13'08"W | wooden         | 28-30                   | 17-18 | 5              | 0.469 | 2.12 ± 0.14             | 1.64             |
| 17     | 1°43'27"N                | 78°48'42"W | Trays          | 20-25                   | 11-15 | 4              | 0.560 | 1.47 ± 0.10             | 1.00             |
| 18     | 4°07'21"N                | 76°13'14"W | floors         | 28-30                   | 17-18 | 4              | 0.459 | 1.59 ± 0.20             | 1.00             |
| 19     | 4°07'21"N                | 76°13'20"W | Trays          | 25-27                   | 18-19 | 3              | 0.651 | 5.19 ± 0.28             | 1.50             |
